# Supplementary material for: High-performance SERS substrate based on perovskite quantum dot–graphene/nano-Au composites for ultrasensitive detection of rhodamine 6G and p-nitrophenol
Source: Royal Society of Chemistry journal article supplement (doi:10.1039/d1tc01351c), 2021-01-01
Supplement: d1tc01351c1.pdf [file d1tc01351c1.pdf]

## Electronic Supporting information

### High-performance SERS substrate based on perovskite quantum dot-graphene/nano-Au composites for ultrasensitive detection of rhodamine 6G and p-nitrophenol

Jiangcai Wang,<sup>a</sup> Cuicui Qiu,<sup>\*a</sup> Hua Pang,<sup>a</sup> Junyu Wu,<sup>b</sup> Mengtao Sun<sup>\*c</sup> and Dameng Liu<sup>\*ad</sup>

<sup>a</sup> State Key Laboratory of Tribology, Tsinghua University, Beijing 100084, China

<sup>b</sup> Electronic Information Science and Technology, School of Physics and Electronics, Central South University, Hunan 410083, China

<sup>c</sup> School of Mathematics and Physics, University of Science and Technology Beijing, Beijing 100083, China

<sup>d</sup> Tianjin Research Institute for Advanced Equipment, Tsinghua University, Tianjin 300300, China

*\* Corresponding Authors*

*Cuicui Qiu, email: cuicuiqiu@aliyun.com*

*Mengtao Sun, email: mengtaosun@ustb.edu.cn*

*Dameng Liu, Tel: 86-10-62797646; email: ldm@tsinghua.edu.cn*

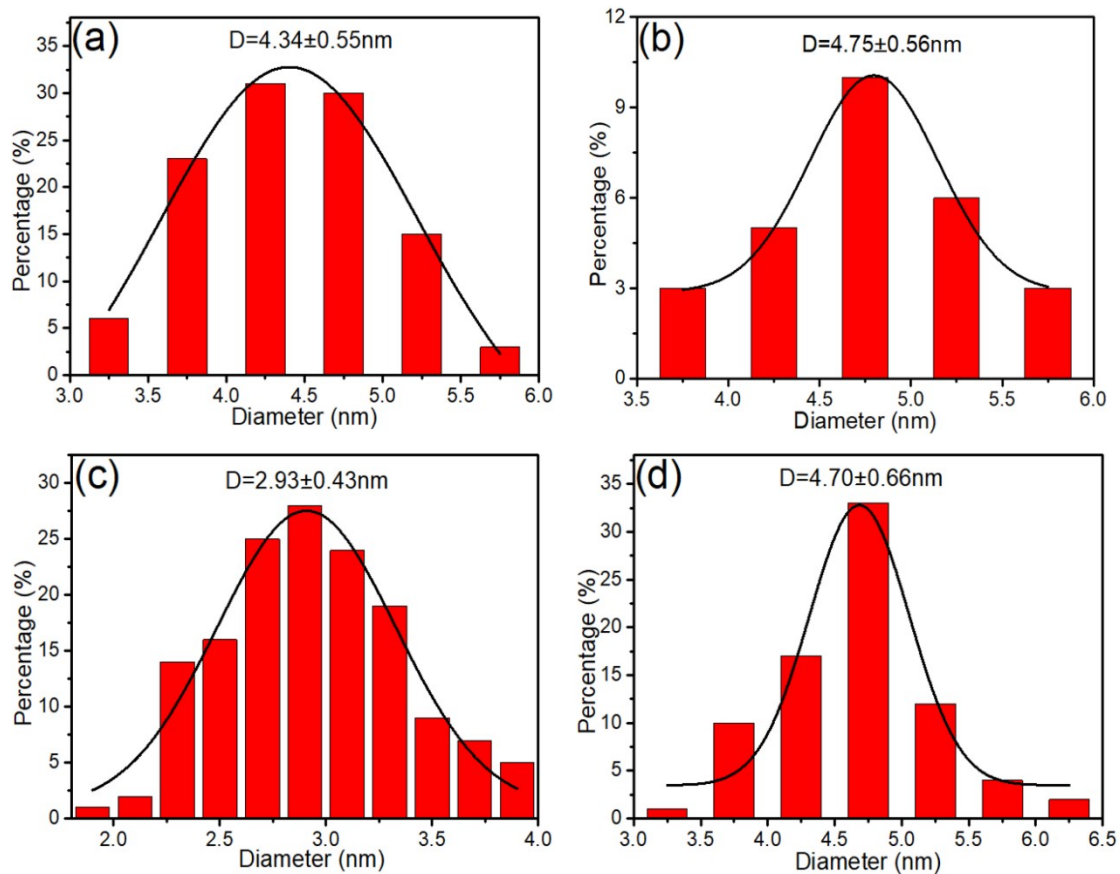

**Fig. S1** The average diameter of PQDs distributed on the Graphene with the synthesis conditions of  $\text{MABr}/\text{PbBr}_2=4/5$  (a),  $\text{MABr}/\text{PbBr}_2=6/5$  (b) with a fixed value of oleylamine/oleic acid (1/25), and oleylamine/oleic acid =1/1 (c), oleylamine/oleic acid =1/50 (d) with a fixed value of  $\text{MABr}/\text{PbBr}_2$  (5/5).

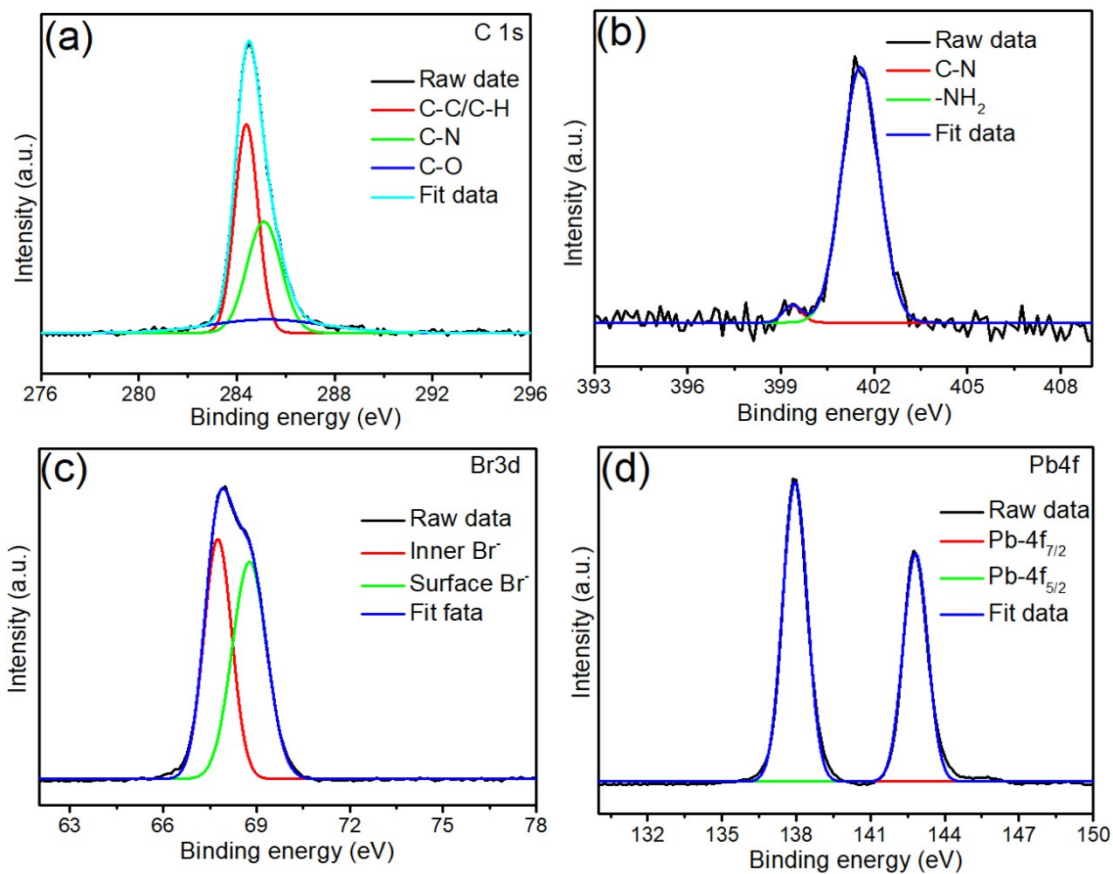

**Fig. S2** XPS of pristine PQDs: C1s (a), N1s (b), Br3d (c), and Pb4f (d).

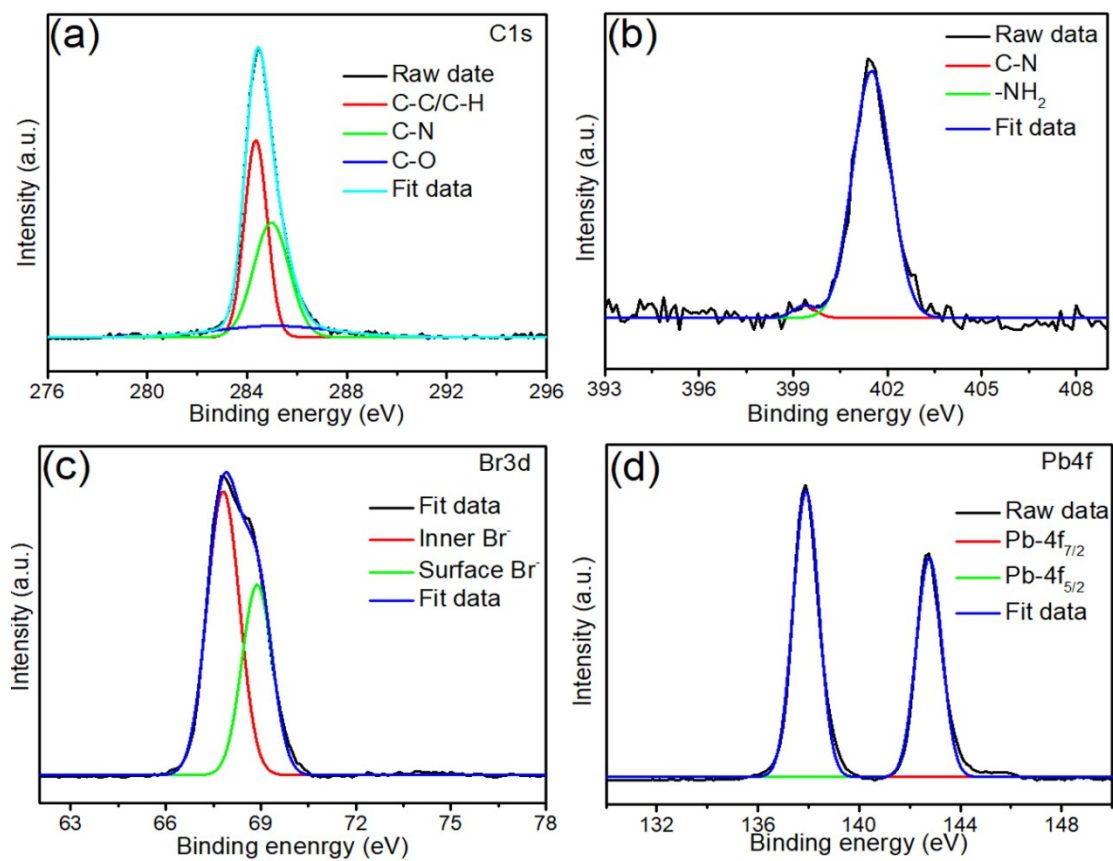

Fig. S3 XPS of hybrid PQD-G: C1s (a), N1s (b), Br3d (c), and Pb4f (d).

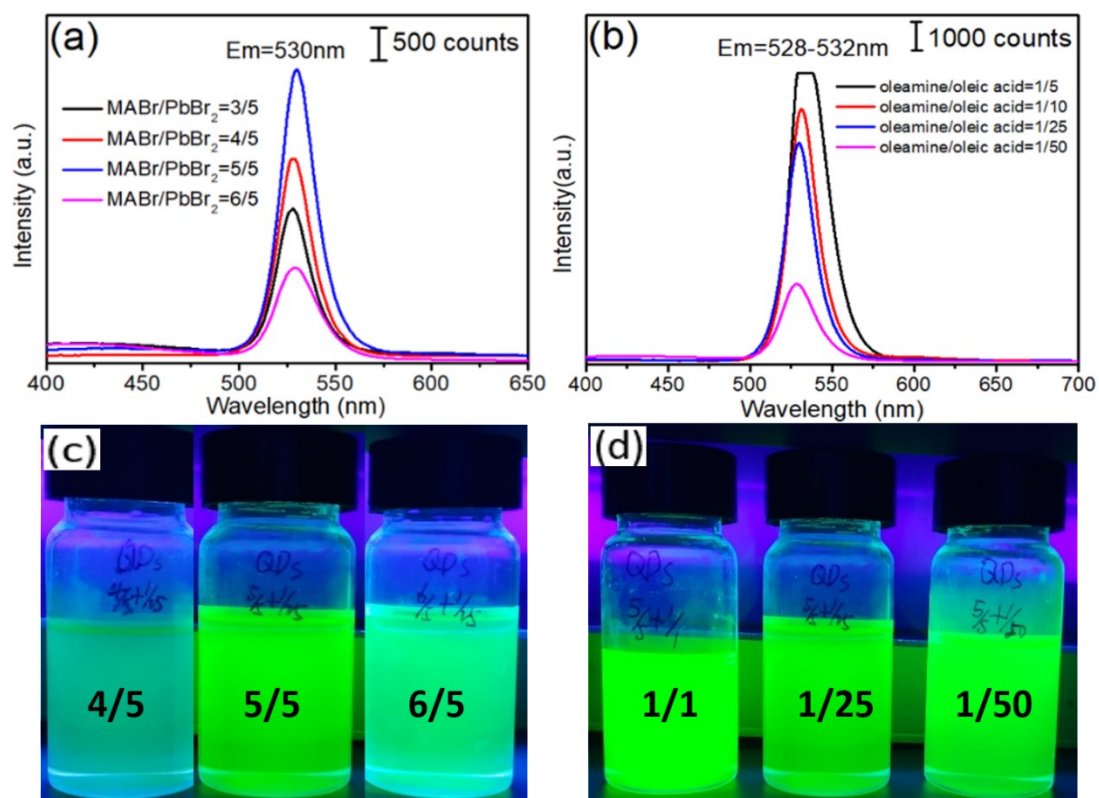

**Fig. S4** (a) The emission spectrum of PQD under different molar ratios of MABr/PbBr<sub>2</sub> (from 3/5 to 6/5) with a fixed molar ratio of oleylamine/oleic acid (1/25). (b) The emission spectrum of PQD under different molar ratios of oleylamine/oleic acid (from 1/5 to 1/50) with a fixed molar ratio of MABr/PbBr<sub>2</sub> (5/5). The luminescence comparison of PQDs at the different molar ratios of (c) MABr/PbBr<sub>2</sub> with a fixed molar ratio of oleylamine/oleic acid (1/25) and (d) oleylamine/oleic acid with a fixed molar ratio of MABr/PbBr<sub>2</sub> (5/5), as taken by using a commercial phone camera under portable ultraviolet lamp illumination with 365 nm.

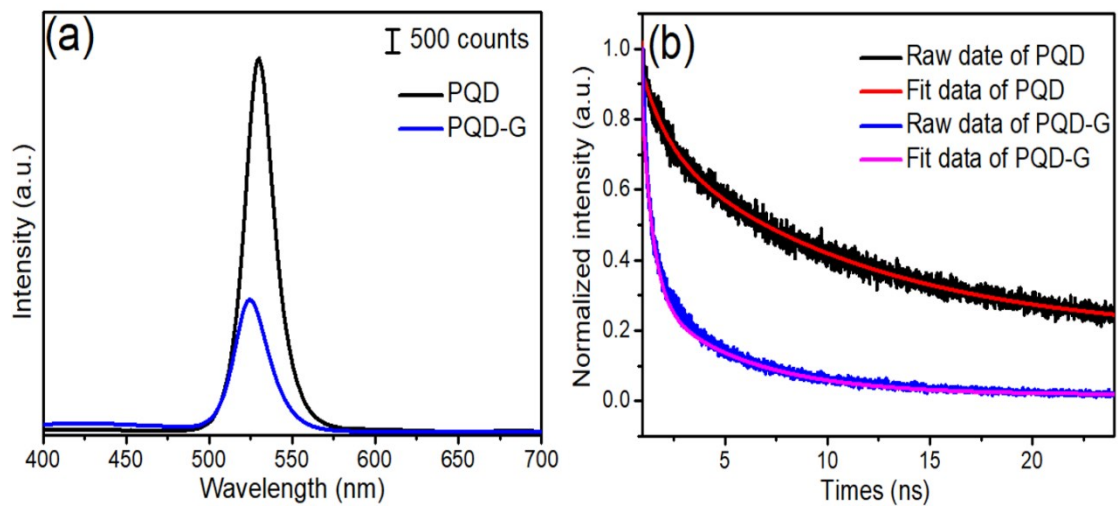

**Fig. S5** (a) PL spectra of the PQD (black) and PQD-G (blue) at 365 nm. (b) PL decay profiles of PQD (black) and PQD-G (blue) at 488 nm.

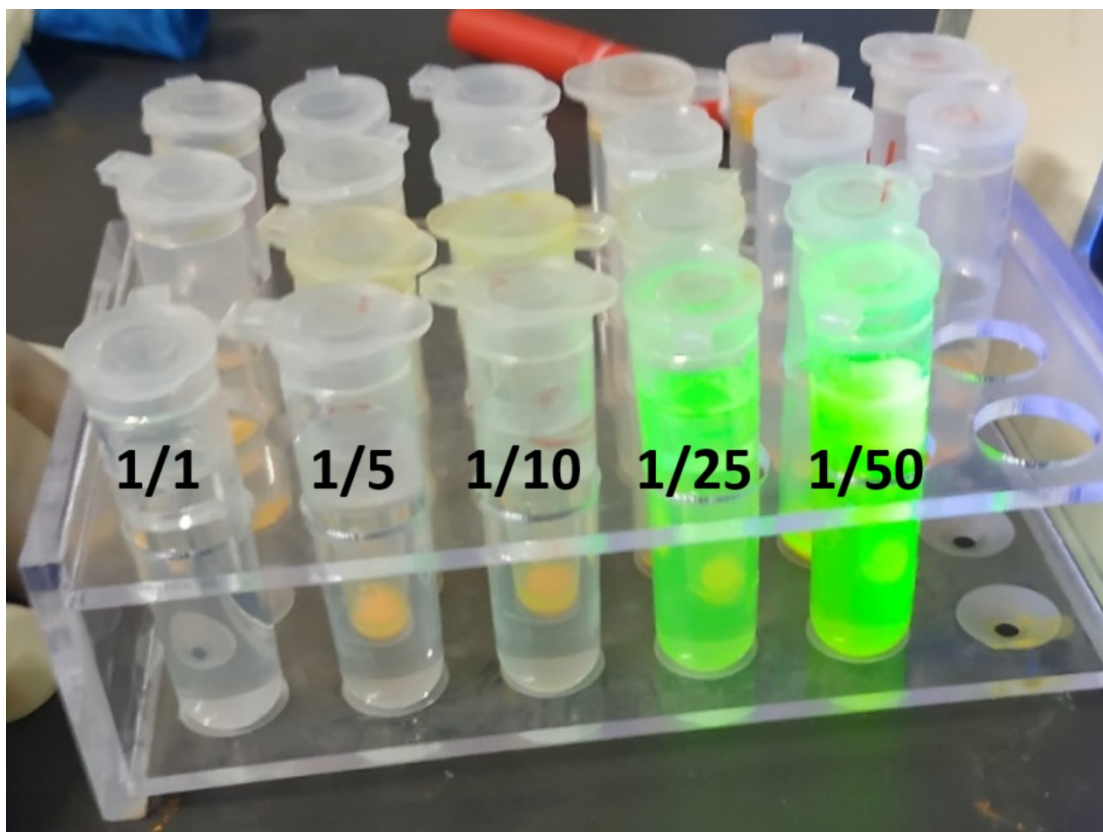

**Fig. S6** The comparison of luminescent stability of PQDs at the different molar ratios of oleylamine/oleic acid with a fixed value of  $\text{MABr/PbBr}_2$  (5/5), which were kept at room temperature for about seven days, as taken by using a commercial phone camera under portable ultraviolet lamp illumination with 365 nm.

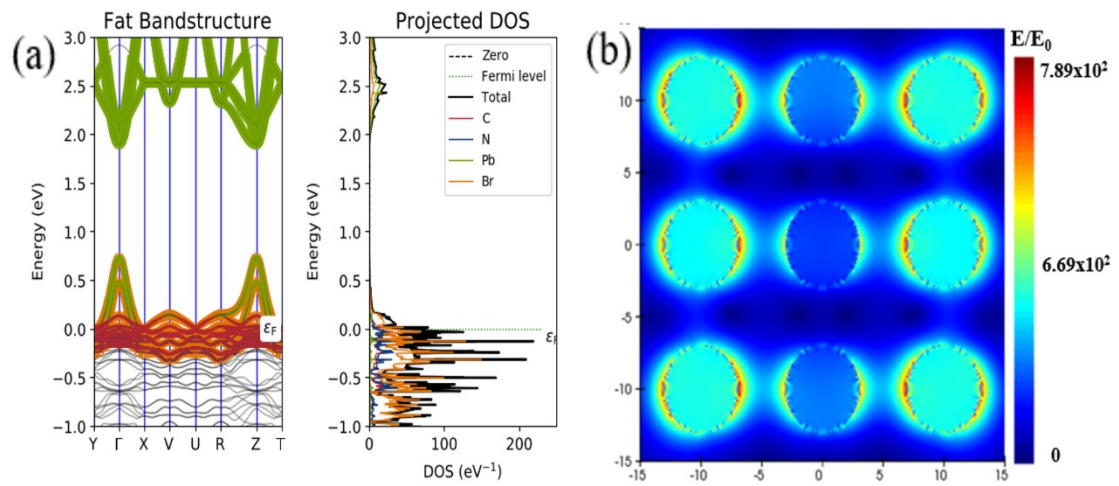

**Fig. S7** (a) The electronic structure (energy) band and density of states of PQDs. (b) A simulated EM field distribution in a periodic  $\text{SiO}_2$ -Cr-Au-G-PQD layered array nanostructure with a fixed radius of PQD nanoparticles (2 nm), gap distance between nanoparticles (4 nm) and graphene thickness (1 nm) at 550 nm.



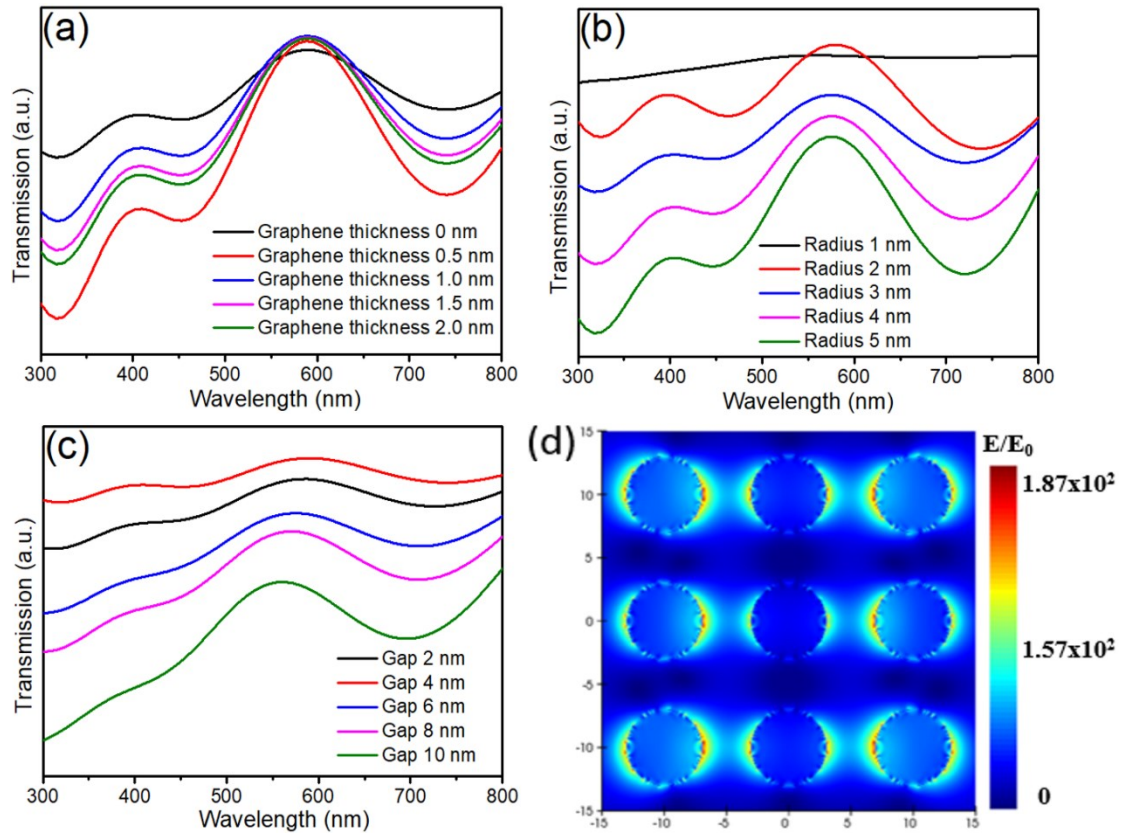

**Fig. S8** A simulated transmission spectra with different synthesis parameters at different excitation wavelength. (a) The thickness of graphene-dependent transmission spectra in a periodic SiO<sub>2</sub>-Cr-Au-G-PQR layered array nanostructure. (b) The radius of PQR-dependent transmission spectra in a periodic SiO<sub>2</sub>-Cr-Au-G-PQR layered array nanostructure. (c) The gap distance between PQR nanoparticles-dependent transmission spectra in a periodic SiO<sub>2</sub>-Cr-Au-G-PQR layered array nanostructure. (d) A simulated EM field distribution in a periodic SiO<sub>2</sub>-Cr-Au layered array nanostructure at 633 nm.

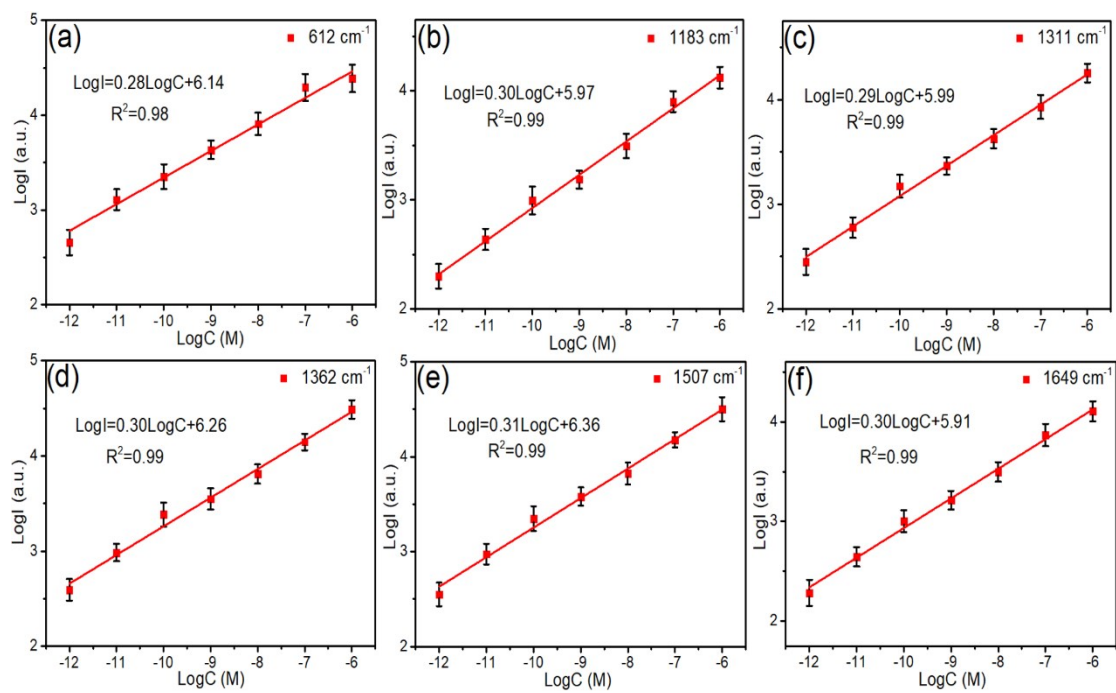

**Fig. S9** Corresponding calibration plots of Fig. 5a for quantitative analysis of R6G at (a) 612  $\text{cm}^{-1}$ , (b) 1183  $\text{cm}^{-1}$ , (c) 1311  $\text{cm}^{-1}$ , (d) 1362  $\text{cm}^{-1}$ , (e) 1507  $\text{cm}^{-1}$ , (f) 1649  $\text{cm}^{-1}$ .

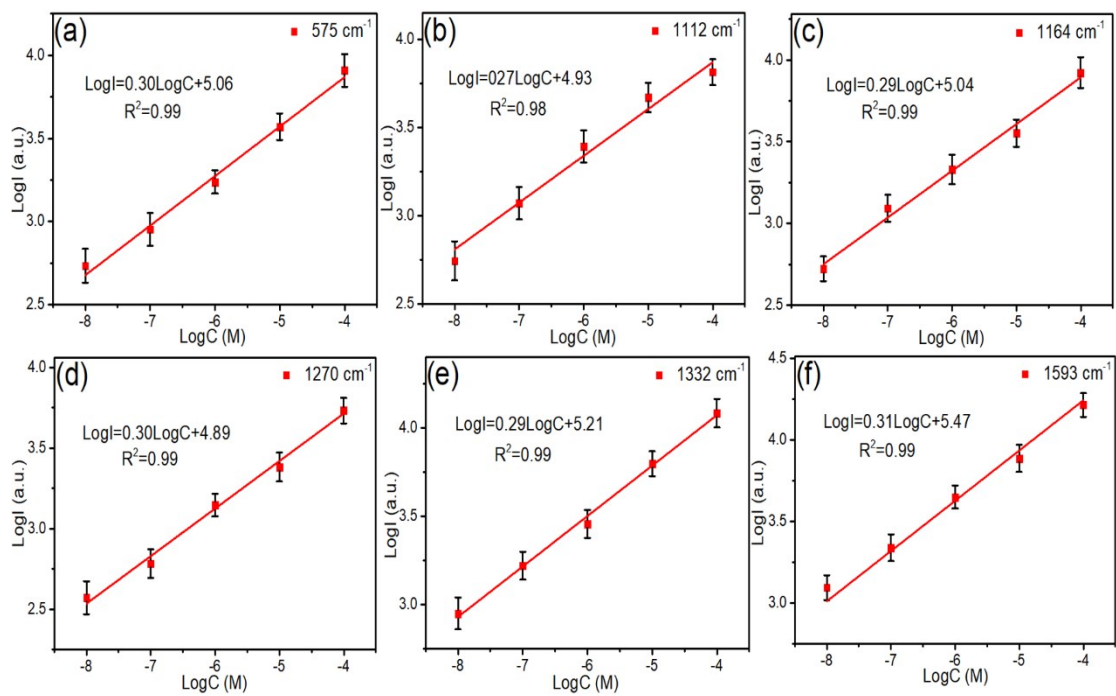

**Fig. S10** Corresponding calibration plots of Fig. 5c for quantitative analysis of PNP at (a) 575 cm<sup>-1</sup>, (b) 1112 cm<sup>-1</sup>, (c) 1164 cm<sup>-1</sup>, (d) 1270 cm<sup>-1</sup>, (e) 1332 cm<sup>-1</sup>, (f) 1593 cm<sup>-1</sup>.

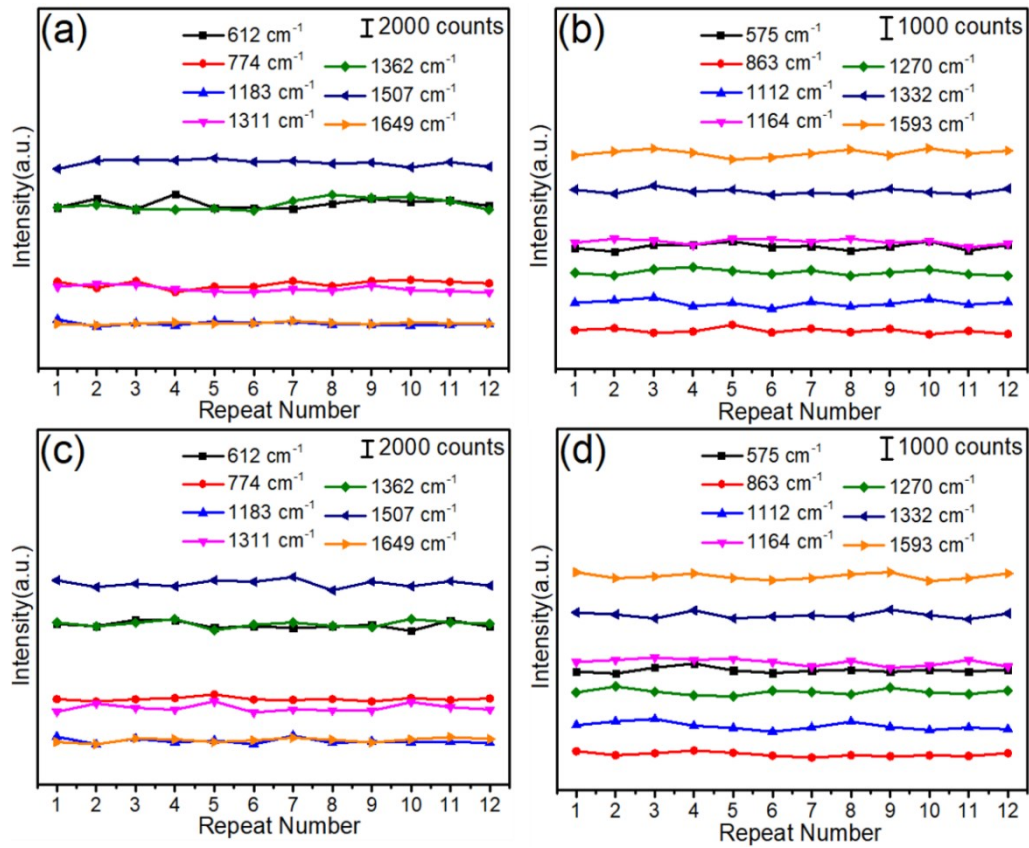

**Fig. S11** SERS intensity responses of the PQD-G/Au for the characteristic peak of  $10^{-6}$  M R6G on 12 random sites from the six different substrates (a) and from the same substrates (c). SERS intensity responses of the PQD-G/Au for the characteristic peak of  $10^{-4}$  M PNP on 12 random sites from the different substrates (b) and from the same substrates (d).

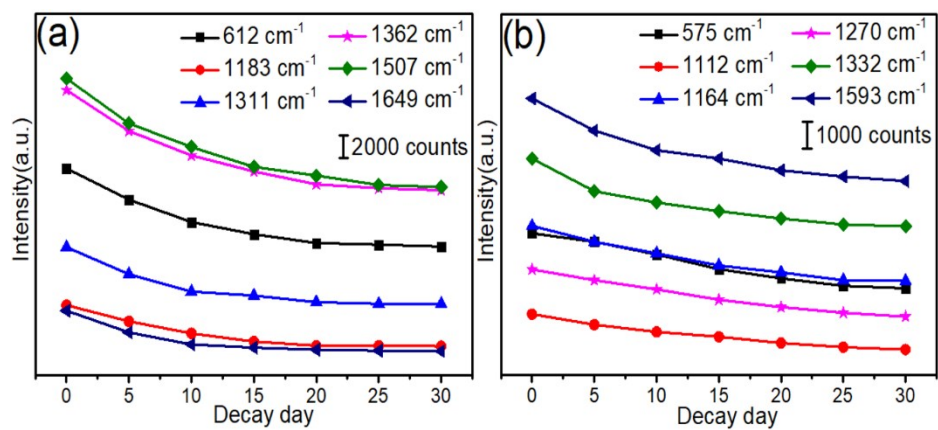

**Fig. S12** The intensity change of other Raman peaks on the optimized PQD-G/Au composite over 30 days of  $10^{-6}$  M R6G (a) and  $10^{-4}$  M PNP (b).

**Table S1** Comparison of detection limits and linear ranges for other SERS substrates.

| SERS substrate          | Preparation method                                                       | Target molecule  | Detection range (M)    | Detection limit (M) | EF               | Ref |
|-------------------------|--------------------------------------------------------------------------|------------------|------------------------|---------------------|------------------|-----|
| G@CuNP/G@Cu             | CVD                                                                      | R6G              | $10^{-9}\sim 10^{-5}$  | $10^{-9}$           | —                | 1   |
| Au NP-G-Ag NA           | EBL <sup>a)</sup> , EBD <sup>b)</sup>                                    | R6G              | —                      | $10^{-13}$          | $6.9\times 10^7$ | 2   |
| GO/Ag/Psi <sup>c)</sup> | Dip-coating, Hummers                                                     | R6G              | $10^{-4}\sim 10^{-7}$  | $10^{-7}$           | —                | 3   |
| G/Ag/LTSi <sup>d)</sup> | Laser Ablation, EBD                                                      | R6G              | $10^{-6}\sim 10^{-11}$ | $10^{-10}$          | $2.6\times 10^7$ | 4   |
| GO/Au                   | CVD                                                                      | R6G              | —                      | $10^{-7}$           | $1.2\times 10^7$ | 5   |
| AuNPs/rGO               | Hydrothermal                                                             | Pb <sup>2+</sup> | $10^{-9}\sim 10^{-6}$  | $10^{-9}$           | —                | 6   |
| G@AgNPs@Si              | Hydrothermal, Electrochemical technology                                 | R6G, Bacteria    | —                      | $10^{-9}$           | $8.3\times 10^6$ | 7   |
| GO/AuNR                 | A seed-mediated method, modified Hummers method                          | Rhodamine 640    | —                      | $10^{-9}$           | $1.0\times 10^4$ | 8   |
| G/CuNPs                 | A two temperature zone CVD method                                        | Adenosine        | $10^{-9}\sim 10^{-7}$  | $10^{-9}$           | —                | 9   |
| haze/GO/Au              | Two-step anodization techniques followed by wet-etching and drop-casting | R6G              | $10^{-3}\sim 10^{-5}$  | —                   | $3.3\times 10^3$ | 10  |

<sup>a)</sup> EBL is the abbreviation of Electron beam lithography.

<sup>b)</sup> EBD is the abbreviation of Electron beam deposition.

<sup>c)</sup> Psi is the abbreviation of /silicon pyramid arrays structure.

<sup>d)</sup> LTSi is the abbreviation of Laser-Textured Si.

**Table S2** Enhancement factor of characteristic peaks of R6G on the optimized PQD-G/Au substrates.

| Peak (cm <sup>-1</sup> ) | EF                    |
|--------------------------|-----------------------|
| 612                      | 3.15×10 <sup>12</sup> |
| 1185                     | 1.71×10 <sup>12</sup> |
| 1311                     | 4.68×10 <sup>12</sup> |
| 1362                     | 3.31×10 <sup>12</sup> |
| 1507                     | 3.57×10 <sup>12</sup> |
| 1649                     | 3.85×10 <sup>12</sup> |

## Supporting references

1. C. Yang, C. Zhang, Y. Huo, S. Jiang, H. Qiu, Y. Xu, X. Li and B. Man, *Carbon*, 2016.
2. Y. Zhao, X. Li, L. Zhang, B. Chu, Q. Liu and Y. Lu, *RSC Advances*, 2017, **7**, 49303-49308.
3. C. Zhang, S. Z. Jiang, Y. Y. Huo, A. H. Liu, S. C. Xu, X. Y. Liu, Z. C. Sun, Y. Y. Xu, Z. Li and B. Y. Man, *Opt. Express*, 2015, **23**, 24811-24821.
4. Z. Chentao, L. Kun, H. Yuanqing and Z. Jianhuan, *Sensors*, 2017, **17**, 1462.
5. X. Liang, B. Liang, Z. Pan, X. Lang, Y. Zhang, G. Wang, P. Yin and L. Guo, *Nanoscale*, 2015, **7**, 20188-20196.
6. Longyun, Zhao, Wei, Gu, Cuiling, Zhang, Xinhao, Shi, Yuezhong and Xian, *Journal of Colloid and Interface ence*, 2016, **465**, 279-285.
7. X. Meng, H. Wang, N. Chen, P. Ding, H. Shi, X. Zhai, Y. Su and Y. He, *Anal. Chem.*, 2018, acs.analchem.7b05139.
8. P. G. Vianna, D. Grasseschi, G. K. B. Costa, I. C. S. Carvalho, S. H. Domingues, J. Fontana and C. J. S. De Matos, *ACS Photonics*, 2016, acsphotronics.6b00109.
9. Shicai, Xu, Baoyuan, Man, Shouzhen, Jiang, Jihua, Wang, Jie and Wei, *Acs Applied Materials & Interfaces*, 2015.
10. S. Behera, J. Im and K. Kim, *ACS Applied Nano Materials*, 2019.
